# Supplementary material
Source: PubMed Central journal article supplement (PMC7155423)
Supplement: NIHMS1531588-supplement-Online_Appendix.pdf [file NIHMS1531588-supplement-Online_Appendix.pdf]

## **ONLINE SUPPLEMENTAL MATERIAL**

### **Methods**

Patient level characteristics included sex, race (white, black, or other), prematurity (< 37 weeks), birth weight (in grams), presence of any extracardiac malformation (anomalies searched include cleft palate, cleft lip, choanal atresia, diaphragmatic hernia, biliary atresia, intestinal malrotation, gastroschisis, omphalocele, esophageal atresia, tracheoesophageal fistula, duodenal atresia, anal atresia, other anomalies of the gastrointestinal system, spine, vertebral anomalies, presence of a genetic syndrome (syndromes searched include: Alagille, CHARGE association (represented by coloboma, renal and ear anomalies), DiGeorge, Goldenhar, Kabuki, Noonan, Williams syndrome, Turner, Trisomy 21, Edwards, Patau, and Cri du chat), year of admission in PHIS, type of health insurance (private, public, other), preoperative intensive care (defined by use of prostaglandin, and/ or mechanical ventilation), preoperative acuity (defined by preoperative use of oxygen, use of prostaglandin, propranolol, total parenteral nutrition, and/or use of arterial blood gas), and age at surgery (days: <=5 days; 6-8 days; 9-15 days; and 16-30 days).

PHIS does not allow for accurate identification of pulmonary valve anatomy and therefore we could not determine the number of patients with pulmonary valve stenosis, atresia, or absent leaflets.

In order to identify a metric for hospital cardiothoracic surgery performance, we chose a commonly performed procedure as a proxy for hospital quality metric. Using the PHIS patients who had a ventricular septal defect (VSD) closure, a commonly performed pediatric cardiovascular surgical procedure, performed between 31 days and 2 years of

life, we calculated average hospital length of stay by year and by hospital, and then created quartiles using the hospital-year distribution of length of stay. The covariates included in the model are the hospital-level percentage of patients discharged after VSD closure with LOS:  $\leq 5$  days; 6-7 days; 8-15 days; and  $> 15$  days.

Hospital preference for complete surgery was calculated as the percentage of patients at each hospital (across all years) who received a complete surgery out of the total patients that year that received complete or staged procedure between 0 and 30 days. Each hospital was classified by the quintile of hospital preference for complete surgery. To control for hospital volume and cardiac case volume, we ranked each hospital into highest and lowest quintiles for average number of staffed beds/year and average number of cardiac cases/year using an average across PHIS years 2004-2015.

## **Results**

The C-statistic for the propensity score model was 0.81. The propensity score had a similar distribution across the two groups: ranging from 0.02 to 0.91 in the staged group and 0.03 to 0.93 in the complete repair group. The mean of the stabilized inverse probability weights was 1 in each group. We did not trim the weights because our analytic results consistently yielded the same conclusions using unstabilized and stabilized inverse probability weights (with or without bootstrapping), and we wanted to retain the full sample for generalizability purposes.

**Online Table 1. Unweighted Patient Characteristics by Surgical Treatment Group**

|                                     | <b>Complete Neonatal<br/>Repair<br/>(N=1032)</b> | <b>Staged Repair<br/>(N=1331)</b> |
|-------------------------------------|--------------------------------------------------|-----------------------------------|
| Male                                | 593 (57.5%)                                      | 725 (54.5%)                       |
| Race                                |                                                  |                                   |
| White or Caucasian                  | 645 (62.5%)                                      | 873 (65.6%)                       |
| Black or African American           | 101 (9.8%)                                       | 207 (15.6%)                       |
| Other                               | 286 (27.7%)                                      | 251 (18.9%)                       |
| Insurance Payer                     |                                                  |                                   |
| Private                             | 445 (43.1%)                                      | 511 (38.4%)                       |
| Public                              | 493 (47.8%)                                      | 694 (52.1%)                       |
| Other                               | 94 (9.1%)                                        | 126 (9.5%)                        |
| Genetic Syndrome                    | 292 (28.3%)                                      | 454 (34.1%)                       |
| Extra-cardiac Anomalies             | 121 (11.7%)                                      | 214 (16.1%)                       |
| Prematurity (< 37 weeks)            | 137 (13.3%)                                      | 212 (15.9%)                       |
| Mean Birth Weight (kg) <sup>†</sup> | 2.70 ± 0.99                                      | 2.73 ± 0.81                       |
| High Preoperative Acuity            | 892 (86.4%)                                      | 1206 (90.6%)                      |
| Age at First Procedure              |                                                  |                                   |

---

|            |             |             |
|------------|-------------|-------------|
| 0-5 days   | 268 (26.0%) | 455 (34.2%) |
| 6-8 days   | 229 (22.2%) | 293 (22.0%) |
| 9-15 days  | 256 (24.8%) | 290 (21.8%) |
| 16-30 days | 279 (27.0%) | 293 (22.0%) |

---

\*Values represented as count (percentage) or †mean ± standard deviation.

**Online Table 2. Unweighted and Weighted Hospital Characteristics by Surgical Treatment Group**

|                                                | Unweighted                        |                        | Weighted                          |                        |                     |         |
|------------------------------------------------|-----------------------------------|------------------------|-----------------------------------|------------------------|---------------------|---------|
|                                                | Complete Neonatal Repair (N=1032) | Staged Repair (N=1331) | Complete Neonatal Repair (N=1032) | Staged Repair (N=1331) | Standard Difference | P-value |
| <b>Hospital Preference for Complete Repair</b> |                                   |                        |                                   |                        |                     |         |
| 5-18% (prefers staged)                         | 45 (4.4%)                         | 384 (28.9%)            | 14.4%                             | 18.3%                  | -10.6%              | 0.095   |
| 19-29%                                         | 100 (9.7%)                        | 349 (26.2%)            | 21.1%                             | 19.4%                  | 4.3%                | 0.42    |
| 30-47%                                         | 181 (17.5%)                       | 285 (21.4%)            | 20.4%                             | 19.8%                  | 1.7%                | 0.75    |
| 48-67%                                         | 215 (20.8%)                       | 168 (12.6%)            | 16.5%                             | 16.5%                  | 0.2%                | 0.97    |
| 69-88% (prefers complete)                      | 491 (47.6%)                       | 145 (10.9%)            | 27.5%                             | 26.0%                  | 3.5%                | 0.50    |
| <b>Number of Hospital Beds</b>                 |                                   |                        |                                   |                        |                     |         |
| 145-264                                        | 228 (22.1%)                       | 339 (25.5%)            | 23.8%                             | 23.8%                  | 0.1%                | 0.98    |
| 271-296                                        | 143 (13.9%)                       | 290 (21.8%)            | 17.8%                             | 18.3%                  | -1.4%               | 0.80    |

|          |             |             |       |       |      |      |
|----------|-------------|-------------|-------|-------|------|------|
| 303-353  | 242 (23.5%) | 248 (18.6%) | 20.8% | 19.5% | 3.3% | 0.54 |
| 377- 442 | 198 (19.2%) | 214 (16.1%) | 16.2% | 17.7% | 3.9% | 0.46 |
| 493-592  | 221 (21.4%) | 240 (18.0%) | 21.4% | 20.7% | 1.5% | 0.76 |

**Number of Cardiac Surgery Cases Per Year**

|          |             |             |       |       |       |      |
|----------|-------------|-------------|-------|-------|-------|------|
| 27-408   | 215 (20.8%) | 266 (20.0%) | 20.9% | 19.4% | 3.9%  | 0.45 |
| 411-522  | 149 (14.4%) | 316 (23.7%) | 18.9% | 19.6% | -1.8% | 0.72 |
| 523-641  | 184 (17.8%) | 292 (21.9%) | 18.0% | 19.1% | -2.6% | 0.60 |
| 642-910  | 232 (22.5%) | 241 (18.1%) | 20.9% | 20.6% | 0.7%  | 0.90 |
| 921-1743 | 252 (24.4%) | 216 (16.2%) | 21.3% | 21.4% | -0.2% | 0.96 |

**Proportion of Patients with Length of Stay<sup>†</sup>**

|          |              |              |              |              |        |      |
|----------|--------------|--------------|--------------|--------------|--------|------|
| 1-5 days | 0.31 (0.10)  | 0.32 (0.12)  | 0.32 (0.13)  | 0.32 (0.093) | 0.47%  | 0.93 |
| 6-7 days | 0.20 (0.049) | 0.20 (0.058) | 0.20 (0.071) | 0.20 (0.060) | -0.73% | 0.86 |

|           |              |              |              |              |        |      |
|-----------|--------------|--------------|--------------|--------------|--------|------|
| 8-15 days | 0.24 (0.048) | 0.23 (0.067) | 0.24 (0.093) | 0.24 (0.078) | -0.67% | 0.87 |
| > 15 days | 0.26 (0.043) | 0.25 (0.044) | 0.25 (0.086) | 0.25 (0.080) | 0.62%  | 0.82 |

\* Values represented as count (percentage) or † mean (standard deviation).

**Online Table 3. Cardiac Complications**

|                                       | Any Cardiac<br>Complication Within<br>Days # 1-7 |            | Any Cardiac<br>Complication Within<br>Days # 2-7 |            | Any Cardiac<br>Complication Within Days<br># 1-30 |             | Any Cardiac<br>Complication Within Days<br># 2-30 |             |
|---------------------------------------|--------------------------------------------------|------------|--------------------------------------------------|------------|---------------------------------------------------|-------------|---------------------------------------------------|-------------|
|                                       | Palliative                                       | Complete   | Palliative                                       | Complete   | Palliative                                        | Complete    | Palliative                                        | Complete    |
|                                       | ECMO                                             | 29 (19.9%) | 38 (21.7%)                                       | 29 (26.6%) | 36 (23.7%)                                        | 61 (20.8%)  | 59 (13.9%)                                        | 62 (23.7%)  |
| Chest Closure                         | 21 (14.4%)                                       | 41 (23.4%) | 20 (18.4%)                                       | 43 (28.3%) | 71 (24.2%)                                        | 158 (37.1%) | 71 (27.1%)                                        | 166 (40.2%) |
| Pleural Effusion with<br>CT Placement | 24 (16.4%)                                       | 23 (13.1%) | 20 (18.4%)                                       | 19 (12.5%) | 53 (18.1%)                                        | 77 (18.1%)  | 50 (19.1%)                                        | 73 (17.7%)  |
| CPR*                                  | 44 (30.1%)                                       | 33 (18.9%) | 14 (12.8%)                                       | 16 (10.5%) | 58 (19.8%)                                        | 48 (11.3%)  | 30 (11.5%)                                        | 32 (7.8%)   |
| CPR NOS*                              | 27 (18.5%)                                       | 9 (5.1%)   | 23 (21.1%)                                       | 6 (4.0%)   | 54 (18.4%)                                        | 21 (4.9%)   | 51 (19.5%)                                        | 18 (4.4%)   |
| Other Shock of<br>Heart**             | 5 (3.4%)                                         |            | 5 (4.6%)                                         | 0          | 8 (2.7%)                                          | 7 (1.6%)    | 8 (3.1%)                                          | 7 (1.7%)    |
| Pacemaker<br>Insertion/Revision       | 8 (5.5%)                                         | 9 (5.1%)   | 7 (6.4%)                                         | 8 (5.3%)   | 9 (3.1%)                                          | 18 (4.2%)   | 8 (3.1%)                                          | 18 (4.4%)   |
| Pacing of Heart                       | 5 (3.4%)                                         | 41 (23.4%) | 5 (4.6%)                                         | 38 (25.0%) | 11 (3.8%)                                         | 70 (16.4%)  | 11 (4.2%)                                         | 67 (16.2%)  |



|                                    |                |                |               |             |                |                |                |                |
|------------------------------------|----------------|----------------|---------------|-------------|----------------|----------------|----------------|----------------|
| Cardioversion***                   | 30 (20.6%)     | 13 (7.4%)      | 27 (24.8%)    | 10 (6.6%)   | 64 (21.8%)     | 40 (9.4%)      | 62 (23.7%)     | 37 (9.0%)      |
| Cardioversion/def ***              | 0              | 0              | 0             | 0           | 0              | 2 (0.5%)       | 0              | 2 (0.5%)       |
| Only 1 Complication<br>on This Day | 112<br>(76.7%) | 149<br>(85.1%) | 79<br>(72.5%) | 133 (87.5%) | 226<br>(77.1%) | 368<br>(86.4%) | 198<br>(75.6%) | 361<br>(87.4%) |

Extracorporeal membrane oxygenation, ECMO; Chest tube, CT; Cardiopulmonary resuscitation, CPR; Not otherwise specified, NOS. CPR NOS indicates CPR events that were identified with ICD-9 code 99.60, and CPR indicates CPR events captured using PHIS CTC code. \*\* Other shock of heart corresponds to ICD-9 code 99.62 (Other electric countershock of heart), comprised of cardioversion: NOS/ external/ conversion to sinus rhythm, defibrillation, external electrode stimulation. Cardioversion values refer to cardioversion identified with ICD-9 code. Cardioversion/def refers to defibrillation (PHIS CTC code).

**Online Table 4. Characteristics of Patients that Died**

|                                     | <b>Staged<br/>Repair, Alive<br/>(N=1184)</b> | <b>Staged<br/>Repair, Died<br/>(N=147)</b> | <b>Complete<br/>Repair, Alive<br/>(N=940)</b> | <b>Complete<br/>Repair, Died<br/>(N=92)</b> |
|-------------------------------------|----------------------------------------------|--------------------------------------------|-----------------------------------------------|---------------------------------------------|
| Male                                | 53.64%                                       | 61.23%                                     | 57.77%                                        | 54.35%                                      |
| Race                                |                                              |                                            |                                               |                                             |
| White or Caucasian                  | 65.96%                                       | 62.59%                                     | 62.55%                                        | 61.96%                                      |
| Black or African American           | 15.11%                                       | 19.05%                                     | 9.68%                                         | 10.87%                                      |
| Other                               | 18.91%                                       | 18.37%                                     | 27.77%                                        | 27.17%                                      |
| Insurance Payer                     |                                              |                                            |                                               |                                             |
| Private                             | 39.27%                                       | 31.29%                                     | 44.26%                                        | 31.52%                                      |
| Public                              | 51.60%                                       | 56.46%                                     | 46.81%                                        | 57.61%                                      |
| Other                               | 9.12%                                        | 12.24%                                     | 8.94%                                         | 10.87%                                      |
| Genetic Syndrome                    | 32.94%                                       | 43.54%                                     | 26.38%                                        | 47.83%                                      |
| Extra-cardiac Anomalies             | 14.61%                                       | 27.89%                                     | 10.53%                                        | 23.91%                                      |
| Prematurity (< 37 weeks)            | 15.46%                                       | 19.73%                                     | 12.55%                                        | 20.65%                                      |
| Mean Birth Weight (kg) <sup>†</sup> | 2.74 (0.81)                                  | 2.62 (0.73)                                | 2.71 (1.0)                                    | 2.58 (0.87)                                 |
| High Preoperative Acuity            | 90.88%                                       | 88.44%                                     | 86.06%                                        | 90.22%                                      |
| Age at First Procedure              |                                              |                                            |                                               |                                             |

---

|            |        |        |        |        |
|------------|--------|--------|--------|--------|
| 0-5 days   | 34.04% | 35.37% | 26.60% | 19.57% |
| 6-8 days   | 22.97% | 14.29% | 22.45% | 19.57% |
| 9-15 days  | 21.62% | 23.13% | 24.15% | 31.52% |
| 16-30 days | 21.37% | 27.21% | 26.81% | 29.35% |

---

\*Values represented as count (percentage) or †mean ± standard deviation.

**Online Table 5: Codes**

| <b>Description</b>                            | <b>ICD-9 Code</b> |
|-----------------------------------------------|-------------------|
| <b>Prematurity</b>                            |                   |
| Prematurity unspecified                       | 765.20            |
| Prematurity <24 weeks                         | 765.21            |
| Prematurity 24 completed                      | 765.22            |
| Prematurity 25-26 weeks                       | 765.23            |
| Prematurity 27-28                             | 765.24            |
| Prematurity 29-30                             | 765.25            |
| Prematurity 31-32                             | 765.26            |
| Prematurity 33-34                             | 765.27            |
| Prematurity 35-36                             | 765.28            |
| Prematurity >=37 weeks                        | 765.29            |
| <b>Extracardiac malformations</b>             |                   |
| Cleft palate                                  | 749.00            |
| Cleft lip                                     | 749.1x            |
| Cleft lip + cleft palate                      | 749.2x            |
| Choanal atresia                               | 748.0             |
| Diaphragmatic hernia                          | 756.6             |
| Biliary atresia                               | 751.61            |
| Intestinal malrotation                        | 751.4             |
| Gastroschisis                                 | 756.73            |
| Omphalocele                                   | 756.72            |
| Esophageal atresia, tracheoesophageal fistula | 750.3             |
| Duodenal atresia                              | 751.1             |

|                                            |                                                            |
|--------------------------------------------|------------------------------------------------------------|
| Anal atresia                               | 751.2                                                      |
| Anomalies of the digestive system          | 751.0, 751.5, 751.6x, 751.7-751.9                          |
| Anomalies of the spine/vertebrae           | 756.19                                                     |
| <b>Genetic Diagnoses</b>                   |                                                            |
| Alagille syndrome                          | 759.89                                                     |
| <u>CHARGE syndrome/association:</u>        |                                                            |
| Coloboma                                   | 377.23                                                     |
| Renal anomalies                            | 753.0, 753.1x, 753.2x, 753.3 to 753.6                      |
| Ear anomalies                              | 744.0x, 744.1, 744.2x, 744.3, 744.4x, 744.5, 744.8x, 744.9 |
| Di George syndrome                         | 279.11                                                     |
| Goldenhar syndrome                         | 756.0 (non-specific code)                                  |
| Kabuki syndrome                            | 759.89 (non-specific code)                                 |
| Noonan syndrome                            | 759.89 (non-specific code)                                 |
| Williams syndrome                          | 759.89                                                     |
| Turner syndrome                            | 758.6                                                      |
| Trisomy 21                                 | 758.0                                                      |
| Trisomy 18                                 | 758.2                                                      |
| Trisomy 13                                 | 758.1                                                      |
| <b>Other major extra-cardiac anomalies</b> |                                                            |
| Anencephaly                                | 740.0                                                      |
| Craniorachischisis                         | 740.1                                                      |
| Iniencephaly                               | 740.2                                                      |
| Spina bifida, with hydrocephalus           | 741.0x                                                     |
| Spina bifida, without hydrocephalus        | 741.9x                                                     |
| Encephalocele                              | 742.0                                                      |

|                                                               |        |
|---------------------------------------------------------------|--------|
| Microcephalus                                                 | 742.1  |
| Reduction deformities of brain                                | 742.2  |
| Congenital hydrocephalus                                      | 742.3  |
| Unspecified anomaly of brain, spinal cord, and nervous system | 742.9  |
| Laryngeal web                                                 | 748.2  |
| Congenital cystic lung                                        | 748.4  |
| Heart block                                                   | 426.10 |
| Heart block 1 <sup>st</sup> degree                            | 426.11 |
| Heart block 2nd degree Mobitz II                              | 426.12 |
| Heart block Wenckebach                                        | 426.13 |
| Cardiac arrest                                                | 427.5  |
| Shock                                                         | 785.50 |
| Cardiogenic shock                                             | 785.51 |
| Circulatory or septic shock                                   | 785.59 |
| Mediastinitis                                                 | 519.2  |
| Septic shock                                                  | 785.52 |
| Laryngomalacia                                                | 748.3  |
| Tracheomalacia                                                | 519.19 |
| Diaphragm paralysis                                           | 519.4  |
| Vocal cord paralysis                                          | 478.30 |
| Necrotizing enterocolitis                                     | 777.50 |
| Urinary tract infection                                       | 599.0  |
| Sepsis                                                        | 995.91 |
| <b>PROCEDURES</b>                                             |        |
| <b>ICD-9 Procedure Codes for Complete TOF repair</b>          |        |

|                                                                    |       |
|--------------------------------------------------------------------|-------|
| Total repair of tetralogy of Fallot                                | 35.81 |
| Open heart valvuloplasty of pulmonary valve without replacement    | 35.13 |
| Open and other replacement of pulmonary valve with tissue graft    | 35.25 |
| Open and other replacement of pulmonary valve                      | 35.26 |
| Repair of ventricular septal defect with prosthesis                | 35.53 |
| Repair of endocardial cushion defect with prosthesis               | 35.54 |
| Repair of unspecified septal defect of heart with tissue graft     | 35.60 |
| Repair of ventricular septal defect with tissue graft              | 35.62 |
| Other and unspecified repair of unspecified septal defect of heart | 35.70 |
| Other and unspecified repair of ventricular septal defect          | 35.72 |
| Other and unspecified repair of endocardial cushion defect         | 35.73 |
| Creation of conduit between right ventricle and pulmonary artery   | 35.92 |
| Other operations on valves of heart                                | 35.99 |
|                                                                    |       |
| <b>ICD-9 Codes for palliative TOF procedures</b>                   |       |
| Closed heart valvotomy, pulmonary valve                            | 35.03 |
| Percutaneous valvuloplasty                                         | 35.96 |
| Systemic to pulmonary artery shunt                                 | 39.0  |
| Other intrathoracic vascular shunt or bypass                       | 39.23 |
| Angioplasty or atherectomy of other non-coronary vessels           | 39.50 |
|                                                                    |       |
| <b>Daily events/complications</b>                                  |       |

|                                              |                        |
|----------------------------------------------|------------------------|
| Cardiopulmonary bypass for heart surgery     | 39.61                  |
| Deep hypothermic cardiopulmonary arrest      | 39.62                  |
| ECMO                                         | 39.65, 39.66           |
| Measurement of systemic arterial blood gases | 89.65                  |
| Packed blood cells                           | 99.04                  |
| Platelet transfusion                         | 99.05                  |
| Fresh frozen plasma                          | 99.06, 99.07           |
| Insertion of endotracheal tube               | 96.04                  |
| Cardiac catheterization                      | 37.21, 37.22, 37.23    |
| Angioplasty                                  | 39.50                  |
| TOF reoperation (CPT codes)                  | 33692, 33694 and 33697 |
| Pericardial effusion/ pericardiocentesis     | 37.0                   |
| Pleural effusion with chest tube             | 34.04                  |
| CPR-not otherwise specified                  | 99.60                  |
| Other shock of heart                         | 99.62                  |
| Packed blood cells                           | 99.04                  |
| Platelet transfusion                         | 99.05                  |
| Fresh frozen plasma                          | 99.06, 99.07           |
| Peritoneal dialysis                          | 39.95                  |
| Exploratory thoracotomy                      | 34.02                  |
| Pacemaker insertion/ revision                | 37.7x                  |
| Pacing of the heart                          | 39.64                  |
| Cardioversion                                | 99.6x                  |
| Chest closure (repair of chest wall)         | 34.7x                  |
| Operations in the diaphragm                  | 34.8x                  |



|                                           |              |
|-------------------------------------------|--------------|
| Mechanical ventilation                    | 96.70        |
| Mechanical ventilation less than 96 hours | 96.71        |
| Mechanical ventilation over 96 hours      | 96.72        |
| Tracheostomy                              | 31.2x        |
| G-tube placement                          | 46.3x, 46.39 |
| Bronchoscopy                              | 33.22        |
| Tracheoesophageal fistula repair          | 31.73        |
| Fixation of intestine                     | 46.6x        |
| Incision of intestine                     | 45.0x        |
